# Supplementary material
Source: PubMed Central journal article supplement (PMC1740082)
Supplement: oenvmed_58_12_762__1.pdf [file oenvmed_58_12_762__1.pdf]

Table 3. Study populations and results of the seroprevalence studies.

| Reference                                                       | Study    | Study population §                                                                                                                                                                                                                                                        | Exposure                                                                                                                               | Prevalence and                                                                                                  | DRR, MA **                                                                                                                                                                                                                                                                                                                                                                   |
|-----------------------------------------------------------------|----------|---------------------------------------------------------------------------------------------------------------------------------------------------------------------------------------------------------------------------------------------------------------------------|----------------------------------------------------------------------------------------------------------------------------------------|-----------------------------------------------------------------------------------------------------------------|------------------------------------------------------------------------------------------------------------------------------------------------------------------------------------------------------------------------------------------------------------------------------------------------------------------------------------------------------------------------------|
| Country                                                         | design ‡ |                                                                                                                                                                                                                                                                           | surrogate ¶                                                                                                                            | risk estimate                                                                                                   | Comments                                                                                                                                                                                                                                                                                                                                                                     |
| Time period †                                                   |          |                                                                                                                                                                                                                                                                           | Outcome                                                                                                                                |                                                                                                                 |                                                                                                                                                                                                                                                                                                                                                                              |
| <u>Study populations and results of the eligible studies. *</u> |          |                                                                                                                                                                                                                                                                           |                                                                                                                                        |                                                                                                                 |                                                                                                                                                                                                                                                                                                                                                                              |
| Lerman et al.<br>(1999) <sup>28</sup><br>Israel<br>1993-1994    | HP       | 1130 patients with<br>clinical HA<br>in a labour force of<br>about 3,700,000<br>Standardised<br>incidence ratios<br>calculated using 2<br>standard populations<br>R: 681 lost cases of<br>similar gender and age.<br>No specific information<br>on vaccination available. | Belonging to<br>occupational<br>group “cleaning<br>and sewage<br>workers”<br>(n=59,480)<br>clinical HA<br>identified in 1993-<br>1994. | SIR: 0.88 and 0.95<br>(99%CI: 0.38-2.03<br>and 0.38-2.42, with<br>standard population<br>1 and 2, respectively) | DRR: NA.<br>Exclusion criteria were age less than 18 y, contact with a<br>family member suffering from HA; travelling to<br>hyperendemic area before the occurrence of the disease,<br>being a tourist, prisoner, and soldier on active duty.<br>MA: age, gender, ethnicity, and time of immigration to<br>Israel controlled for.<br><br>Israel is a country endemic for HA. |

Table 3. continued

|                                                                                         |         |                                                                                                                                                                                                                                                                   |                                                                                                                                                                                           |                                                                                                                                                          |                                                                                                                                                                                                                                                                                                                                                                                                                                                                                                                                                                                                                                                             |
|-----------------------------------------------------------------------------------------|---------|-------------------------------------------------------------------------------------------------------------------------------------------------------------------------------------------------------------------------------------------------------------------|-------------------------------------------------------------------------------------------------------------------------------------------------------------------------------------------|----------------------------------------------------------------------------------------------------------------------------------------------------------|-------------------------------------------------------------------------------------------------------------------------------------------------------------------------------------------------------------------------------------------------------------------------------------------------------------------------------------------------------------------------------------------------------------------------------------------------------------------------------------------------------------------------------------------------------------------------------------------------------------------------------------------------------------|
| Brugha et al.<br>(1998) <sup>29</sup><br>United-<br>Kingdom<br>(London area)<br>1995-96 | CS<br>4 | E: 147 high risk<br>employees from the 3<br>main drainage depots<br>and 3 large sewage<br>treatment works<br>C: 81.<br>Age (all participants):<br>39 (NI)<br>Probably males.<br>P: 85 and 68 % in E<br>and C, respectively.<br>Exclusions and V:<br>see comments. | Exposure to<br>raw sewage<br>(according to<br>manager)<br>ED, EI, EF<br>(frequency of<br>splashes;<br>structured<br>questionnaire)<br>IgG<br><br>clinical diagnosis<br>of viral hepatitis | E: 46 % (sewerage<br>workers)<br>C: 30 %<br>ORs:<br>raw sewage some of the<br>time: 1.14 (0.50-2.59)<br>raw sewage most of the<br>time: 3.73 (1.48-9.37) | DRR: increase (n.s.) in seropositivity with exposure risk as<br>defined by manager (46, 40, 29, 30 % in sewerage<br>workers, flushers and fitters, electricians and supervisors,<br>and unexposed workers, respectively).<br>Increasing OR with frequency of exposure: see OR.<br>MA with numerous confounding factors (travelling in<br>endemic areas, age, socio-economic level, etc.)<br>Lost cases unlikely to have caused a major bias.<br>13 participants secondarily excluded (10 vaccinated<br>subjects and 3 with ambiguous test results).<br>Exposure to raw sewage most of the time may represent a<br>subgroup with particularly high exposure. |
|-----------------------------------------------------------------------------------------|---------|-------------------------------------------------------------------------------------------------------------------------------------------------------------------------------------------------------------------------------------------------------------------|-------------------------------------------------------------------------------------------------------------------------------------------------------------------------------------------|----------------------------------------------------------------------------------------------------------------------------------------------------------|-------------------------------------------------------------------------------------------------------------------------------------------------------------------------------------------------------------------------------------------------------------------------------------------------------------------------------------------------------------------------------------------------------------------------------------------------------------------------------------------------------------------------------------------------------------------------------------------------------------------------------------------------------------|

Table 3. continued

|                                                   |      |                                                                                    |                                              |                         |                                                                                                                                                                    |
|---------------------------------------------------|------|------------------------------------------------------------------------------------|----------------------------------------------|-------------------------|--------------------------------------------------------------------------------------------------------------------------------------------------------------------|
| Cadilhac and Roudot-Thoraval (1996) <sup>30</sup> | CS 3 | E: 155 sewage workers<br>Age: 85.2 % older than 29 y. 125 M (80.6 %).              | CO<br>ED (about 10 ± 8)                      | E: 60 %<br>C: 47.1%     | DRR: no DRR found in multivariate analysis. The seroprevalence of anti-HAV antibodies was very similar in the 3 subgroups defined by EF.                           |
| France (Val de Marne) 1993                        |      | C: 70 employees from the same firm. Age: 90 % older than 29 years.<br>19 M (27 %). | EF (3 grades)<br>“total specific antibodies” | OR: 2.15<br>(1.15-4.00) | Detailed MA: age, gender, educational level, number of siblings, travelling in endemic areas as well as occupational exposure (qualitative indicator, EF, and ED). |
|                                                   |      | P (E +C together): 82 %.                                                           |                                              |                         | Two other papers refer to the same population                                                                                                                      |
|                                                   |      | R: NI Exclusion of immunized subjects: NI                                          |                                              |                         | (Cadilhac and Roudot-Thoraval <sup>50 51</sup> ).                                                                                                                  |
|                                                   |      |                                                                                    |                                              |                         | The publication by Schlosser and Roudot-Thoraval (see below) might include part of the same population.                                                            |

Table 3. continued

|                                                                            |         |                                                                                                                                                                                                                                                                    |                                                                                                                    |                                               |                                                                                                                                                                                                                                                                                                                                                                                                                                                                                                                                                                                  |
|----------------------------------------------------------------------------|---------|--------------------------------------------------------------------------------------------------------------------------------------------------------------------------------------------------------------------------------------------------------------------|--------------------------------------------------------------------------------------------------------------------|-----------------------------------------------|----------------------------------------------------------------------------------------------------------------------------------------------------------------------------------------------------------------------------------------------------------------------------------------------------------------------------------------------------------------------------------------------------------------------------------------------------------------------------------------------------------------------------------------------------------------------------------|
| Benbrik et al. (2000) <sup>31</sup><br>France (City of Paris)<br>1995-1996 | CS<br>2 | E: 201 sewage workers and 390 water-purification station workers. Age: 41 and 39 (23-59 and 20-60) respectively. M only<br>C: 643 administrative workers. Age: 42.5 (21-63) M only. Education level, country of birth, V: see comment.<br>Overall P: 85.5 %. R: NI | CO<br>ED<br>Occupational risk factors ("soiled earth", "floating corpses", etc.)<br>total antibodies (IgG and IgM) | E: 71 %<br>C: 67 %<br>OR(*): 1.17 (0.91-1.50) | DRR: not explored in a MA. MA: factor analysis identified 5 subgroups (non-exposed workers and 4 subgroups of exposed workers). No clear subgroup-specific patterns of occupational risk factors appeared.<br><br>Results very descriptive (no a priori hypothesis tested in a logistic regression model). No clear definition of the types of non-occupational and occupational risk factors (for example "floating corpses").<br><br>Education level and country of birth differed between both groups. Vaccination status recorded but not included in multivariate analysis. |
|----------------------------------------------------------------------------|---------|--------------------------------------------------------------------------------------------------------------------------------------------------------------------------------------------------------------------------------------------------------------------|--------------------------------------------------------------------------------------------------------------------|-----------------------------------------------|----------------------------------------------------------------------------------------------------------------------------------------------------------------------------------------------------------------------------------------------------------------------------------------------------------------------------------------------------------------------------------------------------------------------------------------------------------------------------------------------------------------------------------------------------------------------------------|

Table 3. continued

|                                      |         |                                                                                                                                          |                                                                              |                                                                                                                          |                                                                                                                                                                                                                                                                                                                                                                       |
|--------------------------------------|---------|------------------------------------------------------------------------------------------------------------------------------------------|------------------------------------------------------------------------------|--------------------------------------------------------------------------------------------------------------------------|-----------------------------------------------------------------------------------------------------------------------------------------------------------------------------------------------------------------------------------------------------------------------------------------------------------------------------------------------------------------------|
| Levin et al.<br>(2000) <sup>32</sup> | CS<br>2 | E: 100 sewage workers<br>Age 42.7 (22-67) M only<br>R: NI<br>C: 100 controls matched<br>for age, sex, education,<br>and smoking<br>V: NI | CO<br>EF:<br>daily exposure<br>in 63 % of the<br>cases<br>ED (0.5-35)<br>IgG | E: 82 %<br>C: 91 %<br>OR: exposure<br>to sewage removed<br>from the logistic<br>regression except<br>seniority (see DRR) | DRR: no association with frequency of exposure or use of<br>protective equipment. Increased seniority predicted less<br>seropositivity with an adjusted OR of 0.8 (0.7-0.9).<br>MA: age, education, smoking, seniority, exposure<br>frequency, and several indicators of protective equipment<br>considered in the analysis<br><br>Israel is a country endemic for HA |
|--------------------------------------|---------|------------------------------------------------------------------------------------------------------------------------------------------|------------------------------------------------------------------------------|--------------------------------------------------------------------------------------------------------------------------|-----------------------------------------------------------------------------------------------------------------------------------------------------------------------------------------------------------------------------------------------------------------------------------------------------------------------------------------------------------------------|

Table 3. continued

|                                                                    |         |                                                                                                                                                                                                                                                                                                                                                |                                                                                                 |                                                                                                                                                                                                                                    |                                                                                                                                                                                                                                                                                                                                                                                                                                                                                                                                                                                                                                                                   |
|--------------------------------------------------------------------|---------|------------------------------------------------------------------------------------------------------------------------------------------------------------------------------------------------------------------------------------------------------------------------------------------------------------------------------------------------|-------------------------------------------------------------------------------------------------|------------------------------------------------------------------------------------------------------------------------------------------------------------------------------------------------------------------------------------|-------------------------------------------------------------------------------------------------------------------------------------------------------------------------------------------------------------------------------------------------------------------------------------------------------------------------------------------------------------------------------------------------------------------------------------------------------------------------------------------------------------------------------------------------------------------------------------------------------------------------------------------------------------------|
| Trout et al.<br>(2000) <sup>33</sup><br>U.S.A. (Ohio)<br>1998-1999 | CS<br>2 | E: 163 workers (waste-<br>water treatment plant<br>and wastewater<br>maintenance)<br>Age: 46-47 (23-74)<br>F: 2-3 %. A 2 <sup>nd</sup> plant<br>could not be surveyed.<br>C: 139 workers<br>(recreation centres,<br>electrical workers)<br>Age: 38-39 (20-63).<br>F: 40 and 4%, respectively<br>P: 74-88 %<br>R: NI<br>All workers unimmunized | CO<br>EI (no further<br>information)<br>Saliva IgG<br>Prevalence of<br>jaundice or<br>hepatitis | E: 18 and 31 % in<br>treatment plant and<br>maintenance workers,<br>respectively.<br>C: 20 and 4 % in<br>recreation centres<br>and electrical workers,<br>respectively.<br>Adjusted prevalence<br>ratios (95%CI):<br>1.3 (0.7-2.4) | DRR: no significant DRR. MA: models including<br>occupational factors (exposure, protective equipment,<br>hygiene) as well as age, gender, travelling in endemic<br>areas, education, income, race, household contact, foreign<br>birth.<br>Large differences (up to 20 times) between some sub-<br>groups regarding gender, race, income, and education<br>were found. Thus, crude prevalence rates are hardly<br>comparable.<br>Adjusted prevalence ratios calculated with multivariable<br>regression models.<br>The authors could not account for the low prevalence in<br>electrical workers (however this subgroup was younger<br>and had a higher income). |
|--------------------------------------------------------------------|---------|------------------------------------------------------------------------------------------------------------------------------------------------------------------------------------------------------------------------------------------------------------------------------------------------------------------------------------------------|-------------------------------------------------------------------------------------------------|------------------------------------------------------------------------------------------------------------------------------------------------------------------------------------------------------------------------------------|-------------------------------------------------------------------------------------------------------------------------------------------------------------------------------------------------------------------------------------------------------------------------------------------------------------------------------------------------------------------------------------------------------------------------------------------------------------------------------------------------------------------------------------------------------------------------------------------------------------------------------------------------------------------|

Table 3. continued

|                                                                     |         |                                                                                                                                                                                                                                                      |                                     |                                                                                                                                                                                                                 |                                                                                                                                                                                                                                                                                                                                                                                                                                                                                                                                                               |
|---------------------------------------------------------------------|---------|------------------------------------------------------------------------------------------------------------------------------------------------------------------------------------------------------------------------------------------------------|-------------------------------------|-----------------------------------------------------------------------------------------------------------------------------------------------------------------------------------------------------------------|---------------------------------------------------------------------------------------------------------------------------------------------------------------------------------------------------------------------------------------------------------------------------------------------------------------------------------------------------------------------------------------------------------------------------------------------------------------------------------------------------------------------------------------------------------------|
| Weldon et al.<br>(2000) <sup>34</sup><br>U.S.A (Texas)<br>1996-1997 | CS<br>2 | E: 359 wastewater<br>workers. Age: 41.2 (NI)<br>M: 88.4 %. Hispanic:<br>18.9 %.<br>C: 89 drinking water<br>workers. Age: 41.3 (NI).<br>M: 89.3 %. Hispanic:<br>27 %.<br>P: "approximately 65 -<br>85 %". R: convenience<br>sample.<br>V: see comment | CO<br>EI<br>ED<br>EF<br>IgG and IgM | E: 28.4 %<br>E, Hispanics: 57.4 %<br>E, non-Hispanics: 21.6 %<br>C: 23.6 %<br>C, Hispanics: 50 %<br>C, non-Hispanics: 13.8 %<br><br>OR:<br>1.6 (0.6-4.5) in Hispanics<br>and 2.4 (1.0-5.7) in non-<br>Hispanics | DRR: OR for employment in the wastewater industry for<br>more than 7 y and for skin contact with sewage at least<br>once a day of 1.9 (1.1-3.6) and 1.8 (1-3.3), respectively.<br>MA: travelling to endemic areas not mentioned. In the<br>model used for assessment of DRR ethnicity was no<br>longer considered.<br><br>V: anti-HAV negative participants with a history<br>of HA vaccination not excluded from analysis (anti-<br>HAV assay not always capable of detecting the low levels<br>of anti-HAV that may accompany vaccine-induced<br>immunity). |
|---------------------------------------------------------------------|---------|------------------------------------------------------------------------------------------------------------------------------------------------------------------------------------------------------------------------------------------------------|-------------------------------------|-----------------------------------------------------------------------------------------------------------------------------------------------------------------------------------------------------------------|---------------------------------------------------------------------------------------------------------------------------------------------------------------------------------------------------------------------------------------------------------------------------------------------------------------------------------------------------------------------------------------------------------------------------------------------------------------------------------------------------------------------------------------------------------------|

Table 3. continued

|                             |    |                              |                     |             |                                                |
|-----------------------------|----|------------------------------|---------------------|-------------|------------------------------------------------|
| DeSerres                    | CS | E: 76 sewer workers          |                     |             |                                                |
| et al. (1995) <sup>35</sup> | 2  | P: 75% of all                | ED at this          | E: 54 %     | DRR: no association of seropositivity with ED; |
| Canada (Quebec              |    | municipal sewer workers      | work (10;           | C: 49 %     | MA: socio-economic level and travelling        |
| City area)                  |    | (Quebec City area)           | 1-30)               |             | to endemic areas not considered                |
| 1993                        |    | Age: 41 (28-64) (74M/2F)     | Ig type: NI         | OR(*): 1.20 |                                                |
|                             |    | all born in Canada.          |                     | (0.67-2.17) | R of C group: C "assumed to represent a valid  |
|                             |    | R: those who refused did     | history of jaundice |             | sample of the overall population".             |
|                             |    | not differ from participants | and hepatitis       |             | V: no subject had been vaccinated according to |
|                             |    | by age and ED.               |                     |             | DeSerres <sup>52</sup> .                       |
|                             |    | C: 2 outpatients undergoing  |                     |             |                                                |
|                             |    | lipid testing pro worker     |                     |             |                                                |
|                             |    | (matched on age and sex).    |                     |             |                                                |
|                             |    | P, R, V: see comments.       |                     |             |                                                |



Table 3. continued

|                                            |    |                                                                                                                                                                         |                                                          |                       |                                                                                                                                                                                                                                                                          |
|--------------------------------------------|----|-------------------------------------------------------------------------------------------------------------------------------------------------------------------------|----------------------------------------------------------|-----------------------|--------------------------------------------------------------------------------------------------------------------------------------------------------------------------------------------------------------------------------------------------------------------------|
| Schlosser                                  | CS | E: 110 workers exposed                                                                                                                                                  | CO                                                       | E: 60.9 %             | DRR: not tested in an MA with confounding variables.                                                                                                                                                                                                                     |
| Roudot-Thoraval<br>(1995) <sup>36</sup>    | 2  | to sewage (made of 4<br>subgroups with different<br>exposure types).                                                                                                    | ED (10.3; 1-36)                                          | C: 44.5 %             | MA: travelling to endemic areas not considered.<br>Gender was not a matching criterion. (21 % female<br>workers).                                                                                                                                                        |
| France (region of<br>Paris)<br>Before 1995 |    | C: 110 workers from the<br>same firm matched on<br>age ( $\pm 5y$ ) and<br>education. Age: 36.5<br>(20-58). M: 79 %.<br>R, P: NI. Exclusion of<br>immunized workers: NI | IgG or total<br>antibodies<br><br>history of<br>jaundice | OR: 2.4 (1.6-<br>3.1) | Three other publications or abstracts refer to the same<br>population (Schlosser and Roudot-Thoraval <sup>53 54</sup> ,<br>Roudot-Thoraval and Schlosser <sup>55</sup> ).<br>No new original data in a further letter (Schlosser and<br>Roudot-Thoraval <sup>56</sup> ). |

Table 3. continued

|                                                               |         |                                                                                                                                                                                                                                                                                                          |                                                |                                                |                                                                                                                                                                                                                                                                                                                                                                                                                                                                      |
|---------------------------------------------------------------|---------|----------------------------------------------------------------------------------------------------------------------------------------------------------------------------------------------------------------------------------------------------------------------------------------------------------|------------------------------------------------|------------------------------------------------|----------------------------------------------------------------------------------------------------------------------------------------------------------------------------------------------------------------------------------------------------------------------------------------------------------------------------------------------------------------------------------------------------------------------------------------------------------------------|
| Heng et al.<br>(1994) <sup>37</sup><br>Singapore<br>1992-1993 | CS<br>2 | E: 600 sewage workers<br>P: 77 % of those<br>deployed in Singapore.<br>R: NI. Age: 20-≥50.<br>M: 95 %. Chinese:<br>36.3 %, Indians: 29.5 %<br>C: 453 subjects attending<br>routine health checks.<br>Age: 20-≥50. F: 66.2 %<br>Chinese: 92.3 %<br>Indians: 3.5 %. P, R: NI.<br>All subjects unimmunized. | ED in current job<br>total Ig (IgG and<br>IgM) | E: 72.7 %<br>C: 50.8 %<br>OR:<br>2.2 (1.6-3.1) | no DRR in multivariate analysis<br>MA: age, sex, ethnic group, past medical history and<br>educational level considered. Shellfish consumption not<br>included although it may have been an important<br>confounding variable (Goh et al., <sup>57 58</sup> ).<br>Older age, lower socio-economic level, longer duration of<br>employment, higher frequency of illness collected in the<br>Indian sewage workers who were hardly represented in<br>the control group |
|---------------------------------------------------------------|---------|----------------------------------------------------------------------------------------------------------------------------------------------------------------------------------------------------------------------------------------------------------------------------------------------------------|------------------------------------------------|------------------------------------------------|----------------------------------------------------------------------------------------------------------------------------------------------------------------------------------------------------------------------------------------------------------------------------------------------------------------------------------------------------------------------------------------------------------------------------------------------------------------------|

Table 3. continued

|                                        |         |                                                                                                                                                                                                                                                    |                                                                                                     |                                                                                                      |                                                                                                                                                                                                             |
|----------------------------------------|---------|----------------------------------------------------------------------------------------------------------------------------------------------------------------------------------------------------------------------------------------------------|-----------------------------------------------------------------------------------------------------|------------------------------------------------------------------------------------------------------|-------------------------------------------------------------------------------------------------------------------------------------------------------------------------------------------------------------|
| Skinhoj et al.<br>(1981) <sup>38</sup> | CS<br>2 | E: 77sewer workers<br>Age: Md 44 (21-65). M only                                                                                                                                                                                                   | ED in this plant<br>Md: 9 (1-36)                                                                    | E: 80.5 %<br>C1: 60.5 %                                                                              | DRR: no association between prevalence rates of anti-HAV antibodies and ED or EF after adjusting for age.<br>MA: unclear information; socio-economic status and travelling in endemic areas not considered. |
| Sweden<br>(Copenhagen)<br>Before 1981  |         | C1: 81 gardeners<br>C2: 79 clerks<br>(matching: age, sex,<br>duration of employment).<br>All subjects were<br>municipality workers<br>P: 96 % (E, C1, C2). No<br>information on the third<br>control group (street<br>workers). V: before<br>1992. | EF<br>Probably total<br>IgG<br>jaundice or liver<br>disease unrelated<br>to gall bladder<br>disease | C2: 48.1 %<br>OR(*):<br>2.70 (1.24-5.91)<br>compared with C1<br>4.46 (2.06-9.75)<br>compared with C2 |                                                                                                                                                                                                             |

Table 3. continued

|                                       |         |                                                                                                                                                                                                        |                                                                                                                          |              |                                                                                                                                                                                                                                                                                        |
|---------------------------------------|---------|--------------------------------------------------------------------------------------------------------------------------------------------------------------------------------------------------------|--------------------------------------------------------------------------------------------------------------------------|--------------|----------------------------------------------------------------------------------------------------------------------------------------------------------------------------------------------------------------------------------------------------------------------------------------|
| Khuder et al.<br>(1998) <sup>39</sup> | CS<br>1 | E: 150 wastewater<br>treatment workers<br>age: 43.7 (SD: 9.1)<br>130 M. P: about 62 %<br>(30-100 %). R: NI.<br>C: 54. Age: 44.9 (SD:<br>8.2). 52 M.<br>P: similar to E group.<br>R: NI. V: see comment | high vs low<br>exposure risk<br>(2/3 vs. 1/3)<br>ED: 14.1 (SD: 8)<br>Jaundice/HA<br>(self-administered<br>questionnaire) | NA<br>OR: NA | DRR and MA: inapplicable<br><br>Unclear whether the immunity of control and exposed<br>workers was comparable before employment.<br>Nothing is known about socio-economic level, travelling to<br>endemic areas, seropositivity, and vaccination<br>No anti-HAV antibodies determined. |
|---------------------------------------|---------|--------------------------------------------------------------------------------------------------------------------------------------------------------------------------------------------------------|--------------------------------------------------------------------------------------------------------------------------|--------------|----------------------------------------------------------------------------------------------------------------------------------------------------------------------------------------------------------------------------------------------------------------------------------------|

Table 3. continued

|                                                                                 |         |                                                                                                                                                                                                                                                                                                |                                                                                                                      |                                                   |                                                                                                                                                                                                                                                                                                                                                                                                                                                                                                   |
|---------------------------------------------------------------------------------|---------|------------------------------------------------------------------------------------------------------------------------------------------------------------------------------------------------------------------------------------------------------------------------------------------------|----------------------------------------------------------------------------------------------------------------------|---------------------------------------------------|---------------------------------------------------------------------------------------------------------------------------------------------------------------------------------------------------------------------------------------------------------------------------------------------------------------------------------------------------------------------------------------------------------------------------------------------------------------------------------------------------|
| Leverly et al. (1996) <sup>40</sup><br>France (region of Touraine)<br>1993-1994 | CS<br>1 | E1: 47 workers ("heavily exposed", i.e. work in sewers, septic tanks, and /or with cleaning pumps).<br>E2: 15 workers ("less exposed", i.e. sewage works). Age: 36 (20-57).<br>M only. P: 77.5 %.<br>R: NI.<br>C: 62 subjects matched according to age, sex, and socio-economic status. V: NI. | ED ( $\leq 5$ and $> 5$ )<br>EI ("heavily" and "less exposed", respectively).<br>anti-HAV anti-bodies (type unknown) | E: 61.3 %<br>C: 51.6 %<br>OR(*): 1.48 (0.68-3.23) | DRR: "heavily" exposed workers with $> 5$ y exposure more often seropositive than their controls (92.3 vs 61.5 %, respectively).<br>MA: further counfounders searched for but not used in an MA<br>Relative risks were calculated whereas ORs would have been more appropriate and have given less or non-significant results. Power rather low for subgroups analyses according to age classes.<br><br>The paper by Leverly et al. <sup>59</sup> is an abstract referring to the same population |
|---------------------------------------------------------------------------------|---------|------------------------------------------------------------------------------------------------------------------------------------------------------------------------------------------------------------------------------------------------------------------------------------------------|----------------------------------------------------------------------------------------------------------------------|---------------------------------------------------|---------------------------------------------------------------------------------------------------------------------------------------------------------------------------------------------------------------------------------------------------------------------------------------------------------------------------------------------------------------------------------------------------------------------------------------------------------------------------------------------------|

Table 3. continued

|                                         |         |                                                                                                                                                                                                                                                             |                              |                                                     |                                                                                                                                                                                                                                                                                                                                                                                                                                                            |
|-----------------------------------------|---------|-------------------------------------------------------------------------------------------------------------------------------------------------------------------------------------------------------------------------------------------------------------|------------------------------|-----------------------------------------------------|------------------------------------------------------------------------------------------------------------------------------------------------------------------------------------------------------------------------------------------------------------------------------------------------------------------------------------------------------------------------------------------------------------------------------------------------------------|
| Frolich and Zeller (1993) <sup>41</sup> | CS<br>1 | E: 408 sewage exposed employees (3 subgroups; age: 40.8, 41.1, 40.3; SD: 9.6, 9.9, 12.3). Probably M. P: NI<br>C: 202 subjects from the same plant. Age: 40 (SD: 10.5). Probably M. P: NI. Workers from endemic regions excluded. All subjects unimmunized. | CO<br>total Ig (IgG and IgM) | E: 37.7 %<br>C: 30.2 %<br>COR: see<br>under comment | DRR: not explored (exposure defined qualitatively). No matching (gender, socio-economic level) and no MA<br><br>Non-significant ORs in all 3 subgroups: 1.41 (0.96-2.09), 1.20 (0.56-2.51), 1.58 (0.69-3.62), for workers on the sewage treatment area (n=332), workers on the pumping station, and workers maintaining the flow of a section of a river, respectively. Confidence intervals calculated on the basis of the data presented by the authors. |
|-----------------------------------------|---------|-------------------------------------------------------------------------------------------------------------------------------------------------------------------------------------------------------------------------------------------------------------|------------------------------|-----------------------------------------------------|------------------------------------------------------------------------------------------------------------------------------------------------------------------------------------------------------------------------------------------------------------------------------------------------------------------------------------------------------------------------------------------------------------------------------------------------------------|

Table 3. continued

|                                            |         |                                                                                                                  |               |                            |                                                                                                                                                                                                                                                                                                                                                       |
|--------------------------------------------|---------|------------------------------------------------------------------------------------------------------------------|---------------|----------------------------|-------------------------------------------------------------------------------------------------------------------------------------------------------------------------------------------------------------------------------------------------------------------------------------------------------------------------------------------------------|
| Poole and Shakespeare (1993) <sup>42</sup> | CS<br>1 | E: 40 sewage workers<br>Age: 42.2 (21-58).<br>Probably M. P: 100 %.                                              | CO<br><br>IgG | E: 57.5 %<br><br>C: 33.3 % | DRR: not explored. MA: no MA with age, travelling to endemic areas, and social class.                                                                                                                                                                                                                                                                 |
| United Kingdom (West Midlands) Before 1993 |         | C: 18 road workers. Age: 38.7 (20-62). Probably M.<br>P: NI.<br>"No subject vaccinated in the previous 6 months" |               | COR: 2.71 (0.74-10.23)     | The authors reported a COR of 2.6 (1.04-6.51) by comparison with another control group. However, road workers were specifically selected to take into account age and social class of the potentially exposed workers (Maguire <sup>60</sup> ) and the selection of the second control group may have been biased (Poole and Calvert <sup>61</sup> ). |
|                                            |         |                                                                                                                  |               |                            | Another paper refers to the same population (Shakespeare and Poole <sup>62</sup> ).                                                                                                                                                                                                                                                                   |

Table 3. continued

|                                        |         |                                                                                                                                                                                                                                                          |                                         |                                                                     |                                                                                                                                                                              |
|----------------------------------------|---------|----------------------------------------------------------------------------------------------------------------------------------------------------------------------------------------------------------------------------------------------------------|-----------------------------------------|---------------------------------------------------------------------|------------------------------------------------------------------------------------------------------------------------------------------------------------------------------|
| Chriske et al.<br>(1990) <sup>43</sup> | CS<br>1 | E1: 93 sewer workers.<br>P: 67.8 %. R: NI.                                                                                                                                                                                                               | CO                                      | E1: 65.6 %<br>E2: 56.0 %                                            | DRR: not explored. MA: no MA.                                                                                                                                                |
| Germany<br>(Cologne)<br>Before 1990    |         | E2: 84 workers from<br>sewage treatment works.<br>P: 93.3 %. E1 and E2:<br>age: NI (21-65), gender:<br>NI, German workers only.<br>C: 1831 persons recruited<br>from the general population.<br>Age: NI (21-65). Gender, P,<br>and R: NI. V: before 1992 | anti-HAV anti-<br>bodies (type:<br>NI). | C: 31.2 %<br>OR(*):<br>E1: 4.20 (2.65-6.66)<br>E2: 2.80 (1.76-4.45) | Gender was not a matching criterion.<br><br>The data presented by Hofmann et al. <sup>63</sup> are taken<br>from this study and not from an independent study<br>population. |



Table 3. continued

|                                                         |    |                                                                                                                            |                                                               |                                   |                                                                                                                                                                                                                                              |
|---------------------------------------------------------|----|----------------------------------------------------------------------------------------------------------------------------|---------------------------------------------------------------|-----------------------------------|----------------------------------------------------------------------------------------------------------------------------------------------------------------------------------------------------------------------------------------------|
| Ross et al.<br>(1998) <sup>44</sup>                     | RS | 1037 cases of<br>occupationally acquired<br>infectious diseases                                                            | occupation<br>and<br>industry<br>(standard<br>classification) | no case in<br>sewerage<br>workers | DRR and MA: NA                                                                                                                                                                                                                               |
| United<br>Kingdom<br>October 1996-<br>September<br>1997 |    | Age and gender<br>both specified for<br>only 600 cases<br>R: probably non-<br>representative<br>study population<br>V: NA. | diagnosis of HA<br>made by<br>consultants                     |                                   | No overlap with the study reported by the PHLS working<br>group (1991) (see above)<br><br>Comparison with other surveillance schemes suggests<br>differential underreporting of eligible cases and added<br>an estimated total of 257 cases. |

Table 3. continuedStudy populations and results of the non-eligible studies.

|                                                                                                      |                                     |                                                                                                                                                                                                                                                                             |                                                                                                                                                                                                |                                                                                                                                                                    |                                                                                                                                                                                       |
|------------------------------------------------------------------------------------------------------|-------------------------------------|-----------------------------------------------------------------------------------------------------------------------------------------------------------------------------------------------------------------------------------------------------------------------------|------------------------------------------------------------------------------------------------------------------------------------------------------------------------------------------------|--------------------------------------------------------------------------------------------------------------------------------------------------------------------|---------------------------------------------------------------------------------------------------------------------------------------------------------------------------------------|
| Clark et al.<br>(1984) <sup>45</sup><br>U.S.A.<br>(Memphis,<br>Cincinnati,<br>Chicago).<br>1975-1978 | Cohort<br>(and CS<br>ana-<br>lyses) | E: 339 workers<br>(sewer maintenance,<br>sewage and activated<br>sludge treatment).<br>C: 185 subjects (highway<br>maintenance, water<br>treatment plant, gas and<br>electric public utility).<br>Exact gender and age<br>distribution: NI.<br>P, R: NI. V: before<br>1992. | CO<br>ED (with 2<br>subgroups<br>less than 75<br>months and<br>75 and more).<br>Air and waste-<br>water monitoring.<br>anti-HAV anti-<br>bodies (type NI)<br>every quarter<br>and illness data | Seroconversion in 1/180<br>exposed and 1/69 non-<br>exposed worker who<br>were initially seronegative<br>(exact duration of follow-<br>up for these subjects: NI). | DRR and MA (tested in cross-sectional analyses):<br>exposure effect (defined qualitatively or by ED) n.s. in<br>MA including age, race, and socio-economic index (0.15<br>≤ p ≤ 0.6). |
|------------------------------------------------------------------------------------------------------|-------------------------------------|-----------------------------------------------------------------------------------------------------------------------------------------------------------------------------------------------------------------------------------------------------------------------------|------------------------------------------------------------------------------------------------------------------------------------------------------------------------------------------------|--------------------------------------------------------------------------------------------------------------------------------------------------------------------|---------------------------------------------------------------------------------------------------------------------------------------------------------------------------------------|

Table 3. continued

|                                         |    |                                  |                                   |                                                                                    |                                                                                                                                                                       |
|-----------------------------------------|----|----------------------------------|-----------------------------------|------------------------------------------------------------------------------------|-----------------------------------------------------------------------------------------------------------------------------------------------------------------------|
| PHLS working group (1991) <sup>15</sup> | CC | 3000 cases and controls<br>V: NA | Indicator of exposure: NI         | No increased risk in sewage workers was found according to Maguire <sup>60</sup> . | No further information available. A later full account of the study results was announced in this paper. However, the corresponding publication could not be located. |
| England and Wales (1990-1991)           |    |                                  | Interview<br>Salivary IgG and IgM |                                                                                    |                                                                                                                                                                       |

Table 3. continued

|                                                                    |    |                                                                                                                                                   |                                                   |                                                                                                                       |                                                                                                                                                                                      |
|--------------------------------------------------------------------|----|---------------------------------------------------------------------------------------------------------------------------------------------------|---------------------------------------------------|-----------------------------------------------------------------------------------------------------------------------|--------------------------------------------------------------------------------------------------------------------------------------------------------------------------------------|
| Salano and<br>Copello (1998)<br>Genoa <sup>46</sup><br>Before 1998 | CS | E: 126 (maintenance<br>of sewage network;<br>waste water treatment<br>plant (3 exposure<br>subgroups). M: NI.<br>C: general population.<br>V: NI. | 3 exposure<br>subgroups<br>hepatitis A<br>markers | Decreased risk<br>in exposed workers<br>especially in those<br>aged less than 30<br>years (see comment)<br><br>OR: NI | Seroprevalence > 80 % in all three age classes in<br>control group (< 31, 31-40, > 40 y). In exposed group<br>seroprevalence was about < 5, 25, and 78 % in the same<br>age classes. |
|--------------------------------------------------------------------|----|---------------------------------------------------------------------------------------------------------------------------------------------------|---------------------------------------------------|-----------------------------------------------------------------------------------------------------------------------|--------------------------------------------------------------------------------------------------------------------------------------------------------------------------------------|

Table 3. continued

|                                                                                       |    |                                                                                   |                                    |                                                         |                                                                                                                                                                                                                                                             |
|---------------------------------------------------------------------------------------|----|-----------------------------------------------------------------------------------|------------------------------------|---------------------------------------------------------|-------------------------------------------------------------------------------------------------------------------------------------------------------------------------------------------------------------------------------------------------------------|
| Arvanitidou<br>et al. (1998) <sup>47</sup><br>Greece<br>(Thessaloniki)<br>before 1998 | CS | E: 167 (M and F)<br>P: 82.2 %.<br>C: apparently no<br>non-exposed group<br>V: NI. | ED<br>EI<br>anti-HAV<br>antibodies | E: 93.4 %<br>(100 % over 50 y)<br>no OR in<br>abstract. | DRR: prevalence von anti-HAV antibodies of 100 % in the<br>"highest occupational risk group"; effect of duration of<br>employment was n.s. Several confounding variables<br>were considered. MA: ?.<br><br>No further information available in the abstract |
|---------------------------------------------------------------------------------------|----|-----------------------------------------------------------------------------------|------------------------------------|---------------------------------------------------------|-------------------------------------------------------------------------------------------------------------------------------------------------------------------------------------------------------------------------------------------------------------|

Table 3. continued

|                                            |    |                                                    |                          |                                                          |
|--------------------------------------------|----|----------------------------------------------------|--------------------------|----------------------------------------------------------|
| Tornberg and<br>Ronne (1997) <sup>48</sup> | RS | 3790 cases of HA<br>notified between<br>1980-1995. | notified cases<br>of HA. | average incidence:<br>4.6/100,000<br>population per year |
| Denmark<br>1980-1995                       |    | 1980-1995.<br>V: NA.                               |                          |                                                          |

\* Studies are classified according to strength of their design. General abbreviations are: Md, median; NI: not indicated in the publication; NA: not applicable; n.s.: statistically non-significant; SD: standard deviation.

† Before “year of publication”: indicates that no indication on exact time period could be found

‡ CC: case-control study; CS: cross-sectional study (numbers indicate the rank as described in table 2); HP: historical prospective; RS: reporting scheme.

§ E: exposed; C: controls; population size represents the number of subjects having actually been included (lost cases excluded); age: mean age (range) if not otherwise indicated; M: male; F: female. P: participation rate; R: representativeness of the study population; V: vaccination; “ before 1992”: see methods.

¶ CO: current occupation/job (is mostly a qualitative exposure indicator only); ED: exposure duration in years (mean and range if not otherwise indicated), EI: exposure intensity; EF: exposure frequency.

|| Prevalence: prevalence rates of anti-HAV positive workers. SIR: standardised incidence ratio; OR: adjusted odds ratios and 95 % confidence interval. If no adjusted OR were given crude OR (COR) as reported by the authors are presented. Otherwise, crude ORs (OR<sup>(\*)</sup>) were calculated on the basis of the data available in the publication (see methods).

“Adjusted” means adjustment for the set of confounding variables considered by the authors. However, the models used for adjustment were not always comparable. If the authors calculated several ORs, all the main ORs are indicated.

\*\* DRR: dose-response relationship; MA: multivariate analysis.
